# Supplementary material
Source: Springer Nature journal article supplement (https://www.springermedizin.de/resource/supplementary/12958_2011_960_MOESM8_ESM.pdf/9566592)
Supplement: MOESM8 [file 9566592]

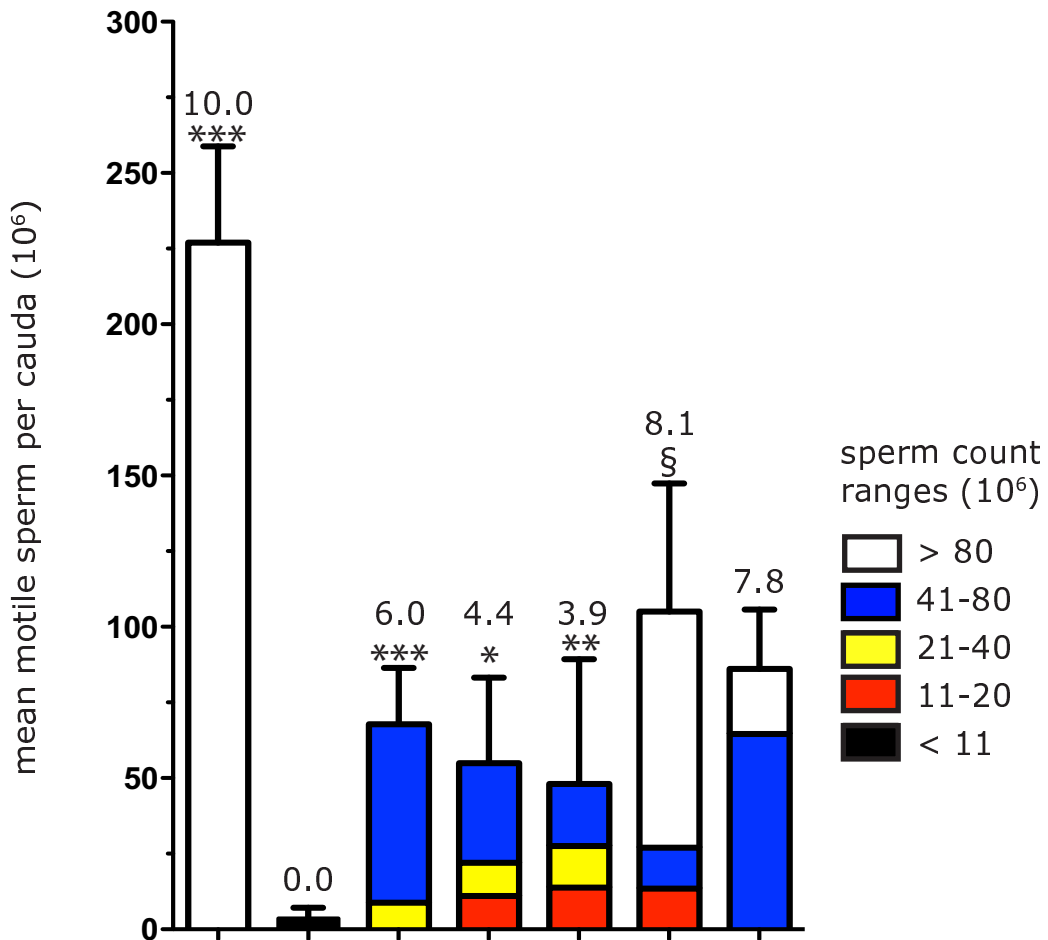

| Group                                | 8 | 9   | 10  | 11  | 12  | 13  | 14  |
|--------------------------------------|---|-----|-----|-----|-----|-----|-----|
| Temperature ( $^{\circ}\text{C}$ )   | - | 37  | 37  | 37  | 35  | 35  | 35  |
| Number of treatments                 | - | 2   | 2   | 1   | 2   | 2   | 2   |
| Duration (minutes)                   | - | 15  | 10  | 10  | 15  | 15  | 10  |
| Coupling medium                      | - | S   | S   | S/W | S   | W   | S   |
| Intensity ( $\text{W}/\text{cm}^2$ ) | - | 2.2 | 2.2 | 2.2 | 2.2 | 2.2 | 2.0 |
| Animals                              | 2 | 7   | 4   | 5   | 8   | 4   | 4   |
| Epididymides                         | 4 | 13  | 8   | 5   | 16  | 8   | 8   |
